# Supplementary material
Source: Royal Society of Chemistry journal article supplement (doi:10.1039/d6nj01321j)
Supplement: d6nj01321j1.pdf [file d6nj01321j1.pdf]

## Synthesis, crystal structure, optical properties and quantum chemical studies of novel organic–inorganic material based on Polyoxodecavanadate

Jawher Makhoulouf <sup>a</sup>, Kandasamy Saravanan <sup>b</sup>, Muhammad Ashfaq <sup>e</sup>, Laurent Jouffret <sup>d</sup>,  
Youness El Bakri <sup>e,\*</sup>, Werner Kaminsky <sup>f</sup>, Sabir Ali Siddique <sup>g</sup>, Aseel Smerat <sup>h</sup>, Adem  
Kilani <sup>a</sup>, Rashad al-Salhi <sup>i</sup>

<sup>a</sup>Laboratory of Physico-Chemistry of Mineral Materials and their Applications, Soliman Biotechnology Center, Tunisia.

<sup>b</sup>Faculty of Chemistry, University of Warsaw, Ludwika Pasteura 1, 02-093 Warsaw, Poland.

<sup>c</sup>Department of Physics, University of Sargodha, Sargodha, Punjab, Pakistan.

<sup>d</sup>Universite Clermont Auvergne, Institut de Chimie de Clermont-Ferrand, BP 10448, F-63000 Clermont-Ferrand, France and CNRS, UMR 6296, ICCF, F-63178 Aubiere Cedex, France.

<sup>e</sup>Department of Theoretical and Applied Chemistry, South Ural State University, Lenin prospect 76, Chelyabinsk, 454080, Russian Federation.

<sup>f</sup>Department of Chemistry Univ. of Washington Seattle, WA 98195 USA.

<sup>g</sup>School of Chemistry and Chemical Engineering, Shandong University, Jinan 250100, China

<sup>h</sup>Faculty of Educational Sciences, Al-Ahliyya Amman University, Amman, 19328, Jordan.

<sup>i</sup>Department of Pharmaceutical Chemistry, College of Pharmacy, King Saud University, Riyadh 11451, Saudi Arabia.

**Corresponding authors:** [yns.elbakri@gmail.com](mailto:yns.elbakri@gmail.com) / [jawhermakhoulouf60@gmail.com](mailto:jawhermakhoulouf60@gmail.com)

**Table S1.** Parallel examination of selected bond distances (Å) in vanadate via XRD.

|       | <b>XRD</b>  |        | <b>XRD</b>  |
|-------|-------------|--------|-------------|
| V1—O1 | 1.594 (2)   | V5—V9  | 3.0898 (7)  |
| V1—O2 | 1.825 (2)   | V5—V8  | 3.1100 (6)  |
| V1—O6 | 1.8278 (19) | V6—O10 | 1.6729 (19) |
| V1—O4 | 1.9270 (19) | V6—O19 | 1.6887 (19) |
| V1—O8 | 2.037 (2)   | V6—O15 | 1.8626 (18) |
| V1—O9 | 2.3830 (19) | V6—O16 | 2.0499 (18) |
| V1—V5 | 3.0631 (7)  | V6—O9  | 2.0964 (18) |

|        |             |         |             |
|--------|-------------|---------|-------------|
| V1—V2  | 3.0753 (7)  | V6—O18  | 2.1041 (17) |
| V1—V4  | 3.1057 (7)  | V6—V10  | 3.0356 (7)  |
| V2—O3  | 1.594 (2)   | V7—O20  | 1.5986 (19) |
| V2—O2  | 1.836 (2)   | V7—O22  | 1.7986 (18) |
| V2—O5  | 1.8617 (19) | V7—O24  | 1.8748 (19) |
| V2—O7  | 1.8850 (19) | V7—O13  | 1.9381 (19) |
| V2—O10 | 2.058 (2)   | V7—O15  | 1.9985 (18) |
| V2—O9  | 2.3135 (18) | V7—O18  | 2.3303 (18) |
| V2—V6  | 3.0723 (7)  | V7—V9   | 3.0766 (6)  |
| V2—V4  | 3.0948 (6)  | V7—V10  | 3.0894 (6)  |
| V2—V3  | 3.1065 (6)  | V8—O21  | 1.6176 (18) |
| V3—O11 | 1.5947 (18) | V8—O23  | 1.7136 (18) |
| V3—O7  | 1.7795 (19) | V8—O14  | 1.9180 (19) |
| V3—O6  | 1.8577 (19) | V8—O25  | 1.947 (2)   |
| V3—O15 | 1.9919 (19) | V8—O16  | 2.1173 (19) |
| V3—O13 | 2.0227 (18) | V8—O18  | 2.1990 (17) |
| V3—O9  | 2.2922 (18) | V8—V9   | 3.0795 (6)  |
| V3—V7  | 3.0291 (7)  | V9—O26  | 1.595 (2)   |
| V3—V6  | 3.1049 (6)  | V9—O27  | 1.796 (2)   |
| V4—O12 | 1.6226 (19) | V9—O22  | 1.8425 (18) |
| V4—O4  | 1.7391 (19) | V9—O23  | 1.9724 (19) |
| V4—O5  | 1.8406 (18) | V9—O17  | 2.028 (2)   |
| V4—O14 | 1.9864 (18) | V9—O18  | 2.3262 (18) |
| V4—O16 | 2.1167 (19) | V9—V10  | 3.0732 (6)  |
| V4—O9  | 2.2294 (17) | V10—O28 | 1.597 (2)   |
| V5—O8  | 1.6785 (19) | V10—O24 | 1.7902 (19) |
| V5—O17 | 1.6880 (19) | V10—O27 | 1.8542 (19) |
| V5—O13 | 1.9085 (18) | V10—O25 | 2.0088 (19) |
| V5—O14 | 1.9540 (18) | V10—O19 | 2.0114 (19) |
| V5—O9  | 2.0783 (18) | V10—O18 | 2.2857 (18) |
| V5—O18 | 2.1447 (18) | —       | —           |

**Table S2.** Parallel examination of selected bond angles (°) in vanadate via XRD.

|          | <b>XRD</b>  |            | <b>XRD</b> |
|----------|-------------|------------|------------|
| O1—V1—O2 | 105.14 (10) | O10—V6—O19 | 107.12 (9) |

|            |             |            |            |
|------------|-------------|------------|------------|
| O1—V1—O6   | 102.02 (10) | O10—V6—O15 | 100.46 (9) |
| O2—V1—O6   | 93.16 (9)   | O19—V6—O15 | 99.85 (9)  |
| O1—V1—O4   | 103.06 (10) | O10—V6—O16 | 93.83 (8)  |
| O2—V1—O4   | 88.38 (8)   | O19—V6—O16 | 94.11 (8)  |
| O6—V1—O4   | 153.53 (9)  | O15—V6—O16 | 156.04 (8) |
| O1—V1—O8   | 100.36 (10) | O10—V6—O9  | 87.62 (8)  |
| O2—V1—O8   | 154.16 (8)  | O19—V6—O9  | 163.86 (8) |
| O6—V1—O8   | 85.53 (8)   | O15—V6—O9  | 83.44 (7)  |
| O4—V1—O8   | 81.79 (8)   | O16—V6—O9  | 78.01 (7)  |
| O1—V1—O9   | 173.69 (9)  | O10—V6—O18 | 164.39 (8) |
| O2—V1—O9   | 81.03 (8)   | O19—V6—O18 | 86.78 (8)  |
| O6—V1—O9   | 78.67 (7)   | O15—V6—O18 | 83.65 (7)  |
| O4—V1—O9   | 75.47 (7)   | O16—V6—O18 | 77.76 (7)  |
| O8—V1—O9   | 73.40 (7)   | O9—V6—O18  | 77.84 (7)  |
| O3—V2—O2   | 103.47 (10) | O20—V7—O22 | 102.22 (9) |
| O3—V2—O5   | 101.43 (9)  | O20—V7—O24 | 102.12 (9) |
| O2—V2—O5   | 91.68 (9)   | O22—V7—O24 | 93.15 (8)  |
| O3—V2—O7   | 102.13 (9)  | O20—V7—O13 | 101.90 (9) |
| O2—V2—O7   | 91.22 (9)   | O22—V7—O13 | 92.11 (8)  |
| O5—V2—O7   | 154.88 (8)  | O24—V7—O13 | 153.70 (8) |
| O3—V2—O10  | 100.14 (10) | O20—V7—O15 | 101.51 (9) |
| O2—V2—O10  | 156.36 (8)  | O22—V7—O15 | 155.61 (8) |
| O5—V2—O10  | 84.73 (8)   | O24—V7—O15 | 87.31 (8)  |
| O7—V2—O10  | 82.67 (8)   | O13—V7—O15 | 77.54 (7)  |
| O3—V2—O9   | 173.75 (10) | O20—V7—O18 | 176.52 (8) |
| O2—V2—O9   | 82.77 (8)   | O22—V7—O18 | 81.08 (7)  |
| O5—V2—O9   | 77.82 (7)   | O24—V7—O18 | 78.66 (7)  |
| O7—V2—O9   | 77.80 (7)   | O13—V7—O18 | 76.74 (7)  |
| O10—V2—O9  | 73.62 (7)   | O15—V7—O18 | 75.10 (7)  |
| O11—V3—O7  | 104.49 (9)  | O16—V8—O18 | 74.32 (7)  |
| O11—V3—O6  | 103.46 (9)  | O21—V8—O23 | 105.19 (9) |
| O7—V3—O6   | 94.54 (9)   | O21—V8—O14 | 101.96 (9) |
| O11—V3—O15 | 99.23 (9)   | O23—V8—O14 | 96.74 (8)  |
| O7—V3—O15  | 91.75 (8)   | O21—V8—O25 | 98.89 (9)  |
| O6—V3—O15  | 154.08 (8)  | O23—V8—O25 | 94.56 (9)  |

|            |            |             |             |
|------------|------------|-------------|-------------|
| O11—V3—O13 | 100.20 (9) | O14—V8—O25  | 152.72 (8)  |
| O7—V3—O13  | 153.84 (8) | O21—V8—O16  | 95.87 (8)   |
| O6—V3—O13  | 87.93 (8)  | O23—V8—O16  | 158.71 (8)  |
| O15—V3—O13 | 75.77 (7)  | O14—V8—O16  | 75.50 (7)   |
| O11—V3—O9  | 173.21 (9) | O25—V8—O16  | 85.08 (8)   |
| O7—V3—O9   | 80.42 (7)  | O21—V8—O18  | 169.87 (8)  |
| O6—V3—O9   | 80.56 (7)  | O23—V8—O18  | 84.76 (8)   |
| O15—V3—O9  | 75.73 (7)  | O14—V8—O18  | 78.30 (7)   |
| O13—V3—O9  | 74.30 (7)  | O25—V8—O18  | 78.11 (7)   |
| O12—V4—O4  | 104.65 (9) |             | 104.99 (10) |
| O12—V4—O5  | 102.77 (9) | O26—V9—O22  | 102.65 (9)  |
| O4—V4—O5   | 97.63 (9)  | O27—V9—O22  | 93.71 (9)   |
| O12—V4—O14 | 99.02 (9)  | O26—V9—O23  | 100.16 (9)  |
| O4—V4—O14  | 93.27 (8)  | O27—V9—O23  | 89.70 (8)   |
| O5—V4—O14  | 152.22 (8) | O22—V9—O23  | 155.18 (8)  |
| O12—V4—O16 | 97.71 (9)  | O26—V9—O17  | 100.14 (10) |
| O4—V4—O16  | 155.88 (8) | O27—V9—O17  | 154.44 (8)  |
| O5—V4—O16  | 85.97 (8)  | O22—V9—O17  | 85.27 (8)   |
| O14—V4—O16 | 74.15 (7)  | O23—V9—O17  | 81.22 (8)   |
| O12—V4—O9  | 170.77 (9) | O26—V9—O18  | 173.45 (9)  |
| O4—V4—O9   | 83.28 (8)  | O27—V9—O18  | 80.48 (7)   |
| O5—V4—O9   | 80.48 (7)  | O22—V9—O18  | 80.32 (7)   |
| O14—V4—O9  | 75.50 (7)  | O23—V9—O18  | 76.02 (7)   |
| O16—V4—O9  | 73.76 (7)  | O17—V9—O18  | 74.16 (7)   |
| O8—V5—O17  | 107.25 (9) | O28—V10—O24 | 105.48 (10) |
| O8—V5—O13  | 98.25 (8)  | O28—V10—O27 | 104.13 (10) |
| O17—V5—O13 | 97.56 (8)  | O24—V10—O27 | 93.75 (8)   |
| O8—V5—O14  | 96.87 (8)  | O28—V10—O25 | 97.74 (9)   |
| O17—V5—O14 | 95.62 (8)  | O24—V10—O25 | 156.23 (9)  |
| O13—V5—O14 | 155.99 (8) | O27—V10—O25 | 85.31 (8)   |
| O8—V5—O9   | 89.31 (8)  | O28—V10—O19 | 99.56 (9)   |
| O17—V5—O9  | 163.29 (8) | O24—V10—O19 | 88.33 (8)   |
| O13—V5—O9  | 81.84 (7)  | O27—V10—O19 | 154.70 (8)  |
| O14—V5—O9  | 79.80 (7)  | O25—V10—O19 | 82.82 (8)   |
| O8—V5—O18  | 166.48 (8) | O28—V10—O18 | 171.13 (9)  |

|            |           |             |           |
|------------|-----------|-------------|-----------|
| O17—V5—O18 | 86.03 (8) | O24—V10—O18 | 81.55 (8) |
| O13—V5—O18 | 82.08 (7) | O27—V10—O18 | 80.43 (8) |
| O14—V5—O18 | 78.90 (7) | O25—V10—O18 | 74.86 (7) |
| O9—V5—O18  | 77.33 (7) | O19—V10—O18 | 74.93 (7) |

**Table S3.** Hydrogen bond geometry (Å, °) of vanadate.

| <i>D—H···A</i>                 | <i>D—H</i> | <i>H···A</i> | <i>D···A</i> | $\angle(D—H···A)^\circ$ |
|--------------------------------|------------|--------------|--------------|-------------------------|
| O16—H16O···O21 <sup>i</sup>    | 0.78 (3)   | 1.92 (3)     | 2.696 (2)    | 170 (3)                 |
| O25—H26O···O12 <sup>i</sup>    | 0.72 (4)   | 1.98 (4)     | 2.696 (3)    | 171 (4)                 |
| N1—H1N···O6 <sup>ii</sup>      | 0.88       | 1.80         | 2.639 (3)    | 159                     |
| C1—H1···O7 <sup>iii</sup>      | 0.95       | 2.14         | 3.009 (3)    | 151                     |
| C1—H1···O11 <sup>iii</sup>     | 0.95       | 2.57         | 3.209 (3)    | 125                     |
| C2—H2···O8                     | 0.95       | 2.57         | 3.447 (3)    | 154                     |
| C3—H3···O4                     | 0.95       | 2.30         | 2.970 (3)    | 127                     |
| C3—H3···O12                    | 0.95       | 2.62         | 3.481 (3)    | 151                     |
| C4—H4···O3 <sup>iii</sup>      | 0.95       | 2.57         | 3.506 (3)    | 168                     |
| N3—H3N···O2W                   | 0.88       | 1.91         | 2.759 (4)    | 162                     |
| C6—H6···O22 <sup>iv</sup>      | 0.95       | 2.25         | 3.104 (3)    | 149                     |
| C7—H7···O1                     | 0.95       | 2.42         | 3.118 (4)    | 131                     |
| C8—H8···O13 <sup>ii</sup>      | 0.95       | 2.24         | 3.173 (3)    | 168                     |
| C10—H10A···O20 <sup>ii</sup>   | 0.95       | 2.66         | 3.324 (4)    | 127                     |
| C10—H10B···O4WA <sup>iii</sup> | 0.95       | 2.60         | 3.474 (9)    | 154                     |
| C10—H10B···O4WB <sup>iii</sup> | 0.95       | 2.63         | 3.130 (10)   | 114                     |
| N5—H5N···O5 <sup>v</sup>       | 0.88       | 1.84         | 2.706 (3)    | 166                     |
| C11—H11···O25 <sup>vi</sup>    | 0.95       | 2.37         | 3.215 (3)    | 148                     |
| C11—H11···O27 <sup>vi</sup>    | 0.95       | 2.51         | 3.271 (3)    | 137                     |
| C12—H12···O3 <sup>v</sup>      | 0.95       | 2.48         | 3.095 (3)    | 123                     |
| C12—H12···O26 <sup>ii</sup>    | 0.95       | 2.34         | 3.253 (3)    | 161                     |
| C13—H13···O23 <sup>ii</sup>    | 0.95       | 2.47         | 3.172 (3)    | 131                     |
| C14—H14···O27 <sup>vi</sup>    | 0.95       | 2.64         | 3.324 (3)    | 130                     |
| N7A—H7AN···O3W                 | 0.88       | 1.89         | 2.745 (7)    | 164                     |
| C16A—H16A···O14 <sup>ii</sup>  | 0.95       | 2.21         | 3.124 (5)    | 161                     |
| C16A—H16A···O17 <sup>ii</sup>  | 0.95       | 2.65         | 3.346 (5)    | 130                     |
| C17A—H17A···O20 <sup>vii</sup> | 0.95       | 2.40         | 3.073 (5)    | 127                     |
| C17A—H17A···O2W <sup>v</sup>   | 0.95       | 2.66         | 3.441 (6)    | 140                     |

|                                          |          |          |            |         |
|------------------------------------------|----------|----------|------------|---------|
| C18A—H18A···O15 <sup>vii</sup>           | 0.95     | 2.41     | 3.224 (5)  | 144     |
| C19A—H19A···O21 <sup>ii</sup>            | 0.95     | 2.59     | 3.287 (4)  | 130     |
| N7B—H7BN···O3 <sup>W</sup>               | 0.88     | 1.59     | 2.329 (17) | 140     |
| C16B—H16B···O14 <sup>ii</sup>            | 0.95     | 2.46     | 3.35 (2)   | 156     |
| C16B—H16B···O23 <sup>ii</sup>            | 0.95     | 2.53     | 3.30 (2)   | 138     |
| C18B—H18B···O11 <sup>vii</sup>           | 0.95     | 2.58     | 3.26 (2)   | 129     |
| C18B—H18B···O15 <sup>vii</sup>           | 0.95     | 2.47     | 3.357 (17) | 155     |
| C18B—H18B···O20 <sup>vii</sup>           | 0.95     | 2.23     | 2.884 (16) | 126     |
| O1 <sup>W</sup> —H1O···O24 <sup>iv</sup> | 0.80 (1) | 1.98 (1) | 2.774 (3)  | 172 (4) |
| O1 <sup>W</sup> —H1P···O28 <sup>i</sup>  | 0.80 (1) | 2.29 (1) | 3.033 (3)  | 155 (2) |
| O2 <sup>W</sup> —H2P···O2                | 0.80 (1) | 2.27 (1) | 2.995 (3)  | 151 (3) |
| O2 <sup>W</sup> —H2P···O4                | 0.80 (1) | 2.63 (3) | 3.182 (3)  | 128 (3) |
| O2 <sup>W</sup> —H2P···O5                | 0.80 (1) | 2.65 (2) | 3.328 (3)  | 143 (3) |
| O2 <sup>W</sup> —H2O···O1 <sup>W</sup>   | 0.80 (1) | 1.97 (1) | 2.758 (4)  | 171 (3) |
| O3 <sup>W</sup> —H3P···O4WA <sup>v</sup> | 0.80 (1) | 1.81 (2) | 2.543 (11) | 152 (3) |
| O3 <sup>W</sup> —H3O···O3 <sup>v</sup>   | 0.80 (1) | 2.53 (1) | 3.300 (5)  | 163 (3) |
| O3 <sup>W</sup> —H3O···O26 <sup>ii</sup> | 0.80 (1) | 2.57 (2) | 3.113 (5)  | 126 (3) |
| O4WA—H4O···O2                            | 0.80 (1) | 2.06 (1) | 2.829 (8)  | 161 (4) |
| O4WA—H4P···O4WA <sup>v</sup>             | 0.80 (1) | 1.60 (2) | 2.386 (17) | 165 (6) |
| O4WB—H5O···O1                            | 0.80 (1) | 2.58 (2) | 3.206 (7)  | 136 (3) |
| O4WB—H5O···N7B                           | 0.80 (1) | 2.38 (3) | 3.028 (18) | 139 (4) |
| O4WB—H5P···O6                            | 0.80 (1) | 2.20 (2) | 2.927 (7)  | 151 (3) |

**Symmetry codes:** (i)  $-x+1, -y+1, -z$ ; (ii)  $-x+1, -y+1, -z+1$ ; (iii)  $x+1, y, z$ ; (iv)  $x+1, y-1, z$ ; (v)  $-x+1, -y, -z+1$ ; (vi)  $x, y-1, z+1$ ; (vii)  $-x, -y+1, -z+1$ .
